# Supplementary material
Source: PubMed Central journal article supplement (PMC9374779)
Supplement: 41598_2022_17197_MOESM1_ESM.pdf [file 41598_2022_17197_MOESM1_ESM.pdf]

**ASSOCIATION BETWEEN OBESITY AND COVID-19 MORTALITY AND  
LENGTH OF STAY IN INTENSIVE CARE UNIT PATIENTS IN BRAZIL: A  
RETROSPECTIVE COHORT STUDY**

Vitor Barreto Paravidino<sup>1,2\*</sup>, Tatiana Henriques Leite<sup>1</sup>, Mauro Felipe Felix Mediano<sup>3,4</sup>,  
Rosely Sichieri<sup>1</sup>, Gulnar Azevedo e Silva<sup>1</sup>, Victor Cravo<sup>5</sup>, Alex Balduino<sup>6</sup>, Emmanuel  
Salgueiro<sup>5</sup>, Bruno Adler Maccagnan Pinheiro Besen<sup>7</sup>, Rodrigo de Carvalho Moreira<sup>6</sup>,  
Carlos Eduardo Brandão<sup>8</sup>, Danilo Cosme Klein Gomes<sup>1</sup>, Cinthia Almeida Guimarães<sup>1</sup>,  
Pedro Cougo<sup>5</sup>

**Table S1.** Hazard ratios for COVID-19 mortality and length of stay in ICU for older adults, according to alternative BMI thresholds <sup>1</sup>.

| BMI categories              | COVID-19 mortality<br>(n= 3690) |      |           |         | Length of stay in ICU<br>(n= 2108) |             |           |         |
|-----------------------------|---------------------------------|------|-----------|---------|------------------------------------|-------------|-----------|---------|
|                             | n                               | HR   | 95%CI     | p-value | n                                  | $e^{\beta}$ | 95%CI     | p-value |
| < 22 kg/m <sup>2</sup>      | 257                             | 1.10 | 0.91-1.35 | 0.33    | 147                                | 0.91        | 0.76-1.09 | 0.30    |
| 22 – 26.9 kg/m <sup>2</sup> | 1290                            | ref  | ---       | ---     | 687                                | ref         | ---       | ---     |
| 27 - 29.9 kg/m <sup>2</sup> | 817                             | 0.88 | 0.77-1.00 | 0.05    | 472                                | 1.08        | 0.96-1.21 | 0.19    |
| ≥ 30 kg/m <sup>2</sup>      | 1326                            | 0.87 | 0.77-0.97 | 0.02    | 802                                | 1.13        | 1.02-1.25 | 0.02    |

adjusted for age, sex, smoking status

#### Reference

1. Sociedade Española de Nutricion Parenteral y Enteral; SEGG, Sociedad Española de Geriatria y Gerontologia. *Valoración Nutricional Del Anciano*. (1st, ed.); 2011.

**Table S2.** Hazard ratios (HR) for COVID-19 mortality, according to age groups and BMI categories, considering the missing data on covariates.

| < 60 y                | Model 1 (n=3989)  |           |         | Model 2 (n=3989) |           |         |
|-----------------------|-------------------|-----------|---------|------------------|-----------|---------|
|                       | HR                | 95%CI     | p-value | HR               | 95%CI     | p-value |
| underweight           | 3.00              | 1.32-6.81 | 0.009   | 2.81             | 1.24-6.37 | 0.01    |
| normal/overweight     | ref               | ---       | ---     | ref              | ---       | ---     |
| mild/moderate obesity | 1.13              | 0.96-1.33 | 0.14    | 1.13             | 0.97-1.33 | 0.13    |
| severe obesity        | 1.33              | 1.07-1.66 | 0.01    | 1.28             | 1.02-1.60 | 0.03    |
| ≥ 60 y                | Model 1 (n= 3961) |           |         | Model 2 (n=3961) |           |         |
|                       | HR                | 95%CI     | p-value | HR               | 95%CI     | p-value |
| underweight           | 1.13              | 0.74-1.72 | 0.58    | 1.12             | 0.73-1.72 | 0.59    |
| normal/overweight     | ref               | ---       | ---     | ref              | ---       | ---     |
| mild/moderate obesity | 0.90              | 0.81-1.00 | 0.06    | 0.89             | 0.80-0.99 | 0.04    |
| severe obesity        | 1.19              | 0.93-1.52 | 0.17    | 1.16             | 0.91-1.49 | 0.23    |

Models adjusted for age, sex, smoking status, hypertension, diabetes

Model 1: missing data for hypertension, diabetes, and smoking were categorized as case

Model 2: missing data for hypertension, diabetes, and smoking were categorized as non-case

**Table S3.** Hazard ratios (HR) for COVID-19 mortality according to age groups and BMI categories, excluding those older individuals admitted to ICU between February 01 to May 31, 2021.

| BMI categories        | Model 1 (n=2714) |      |           |         | Model 2 (n=2533) |      |           |         | Model 3 (n=2533) |      |           |         |
|-----------------------|------------------|------|-----------|---------|------------------|------|-----------|---------|------------------|------|-----------|---------|
|                       | n                | HR   | 95%CI     | p-value | n                | HR   | 95%CI     | p-value | n                | HR   | 95%CI     | p-value |
| underweight           | 38               | 1.55 | 1.01-2.40 | 0.05    | 36               | 1.17 | 0.74-1.84 | 0.51    | 36               | 1.14 | 0.72-1.81 | 0.58    |
| normal/overweight     | 1755             | ref  | ---       | ---     | 1614             | ref  | ---       | ---     | 1614             | ref  | ---       | ---     |
| mild/moderate obesity | 823              | 0.81 | 0.71-0.93 | 0.002   | 790              | 0.89 | 0.77-1.02 | 0.09    | 790              | 0.89 | 0.78-1.02 | 0.10    |
| severe obesity        | 98               | 0.86 | 0.63-1.17 | 0.34    | 93               | 1.05 | 0.76-1.46 | 0.77    | 93               | 1.04 | 0.74-1.45 | 0.83    |

Model 1: unadjusted

Model 2: adjusted for age, sex, smoking status

Model 3: adjusted for age, sex, smoking status, hypertension, diabetes

**Table S4.** Length of stay in ICU, among the survivors, according to age groups and BMI categories, excluding those individuals admitted to ICU between February 01 to May 31, 2021.

| BMI categories        | Model 1 (n=1597) |             |           |         | Model 2 (n=1464) |             |           |         | Model 3 (n=1464) |             |           |         |
|-----------------------|------------------|-------------|-----------|---------|------------------|-------------|-----------|---------|------------------|-------------|-----------|---------|
|                       | n                | $e^{\beta}$ | 95%CI     | p-value | n                | $e^{\beta}$ | 95%CI     | p-value | n                | $e^{\beta}$ | 95%CI     | p-value |
| underweight           | 17               | 1.47        | 0.90-2.40 | 0.12    | 17               | 1.60        | 0.98-2.62 | 0.06    | 17               | 1.62        | 0.99-2.64 | 0.06    |
| normal/overweight     | 1009             | ref         | ---       | ---     | 904              | ref         | ---       | ---     | 904              | ref         | ---       | ---     |
| mild/moderate obesity | 514              | 1.09        | 0.98-1.22 | 0.11    | 489              | 1.09        | 0.97-1.22 | 0.14    | 489              | 1.08        | 0.96-1.21 | 0.18    |
| severe obesity        | 57               | 1.14        | 0.87-1.50 | 0.35    | 54               | 1.06        | 0.80-1.42 | 0.68    | 54               | 1.04        | 0.78-1.39 | 0.77    |

Model 1: unadjusted

Model 2: adjusted for age, sex, smoking status

Model 3: adjusted for age, sex, smoking status, hypertension, diabetes

Table S2. STROBE checklist

|                            |                     | Reporting Item                                                                                                                                                                                                                                                   | Page Number |
|----------------------------|---------------------|------------------------------------------------------------------------------------------------------------------------------------------------------------------------------------------------------------------------------------------------------------------|-------------|
| <b>Title and abstract</b>  |                     |                                                                                                                                                                                                                                                                  |             |
| Title                      | <a href="#">#1a</a> | Indicate the study's design with a commonly used term in the title or the abstract                                                                                                                                                                               | 1           |
| Abstract                   | <a href="#">#1b</a> | Provide in the abstract an informative and balanced summary of what was done and what was found                                                                                                                                                                  | 3-4         |
| <b>Introduction</b>        |                     |                                                                                                                                                                                                                                                                  |             |
| Background / rationale     | <a href="#">#2</a>  | Explain the scientific background and rationale for the investigation being reported                                                                                                                                                                             | 5-6         |
| Objectives                 | <a href="#">#3</a>  | State specific objectives, including any prespecified hypotheses                                                                                                                                                                                                 | 6           |
| <b>Methods</b>             |                     |                                                                                                                                                                                                                                                                  |             |
| Study design               | <a href="#">#4</a>  | Present key elements of study design early in the paper                                                                                                                                                                                                          | 6           |
| Setting                    | <a href="#">#5</a>  | Describe the setting, locations, and relevant dates, including periods of recruitment, exposure, follow-up, and data collection                                                                                                                                  | 6-7         |
| Eligibility criteria       | <a href="#">#6a</a> | Give the eligibility criteria, and the sources and methods of selection of participants. Describe methods of follow-up.                                                                                                                                          | 7           |
| Eligibility criteria       | <a href="#">#6b</a> | For matched studies, give matching criteria and number of exposed and unexposed                                                                                                                                                                                  | N/A         |
| Variables                  | <a href="#">#7</a>  | Clearly define all outcomes, exposures, predictors, potential confounders, and effect modifiers. Give diagnostic criteria, if applicable                                                                                                                         | 7-8         |
| Data sources / measurement | <a href="#">#8</a>  | For each variable of interest give sources of data and details of methods of assessment (measurement). Describe comparability of assessment methods if there is more than one group. Give information separately for exposed and unexposed groups if applicable. | 7-8         |
| Bias                       | <a href="#">#9</a>  | Describe any efforts to address potential sources of bias                                                                                                                                                                                                        | 9           |
| Study size                 | <a href="#">#10</a> | Explain how the study size was arrived at                                                                                                                                                                                                                        | 7           |

|                        |                      |                                                                                                                                                                                                                                                                            |                    |
|------------------------|----------------------|----------------------------------------------------------------------------------------------------------------------------------------------------------------------------------------------------------------------------------------------------------------------------|--------------------|
| Quantitative variables | <a href="#">#11</a>  | Explain how quantitative variables were handled in the analyses. If applicable, describe which groupings were chosen, and why                                                                                                                                              | 8                  |
| Statistical methods    | <a href="#">#12a</a> | Describe all statistical methods, including those used to control for confounding                                                                                                                                                                                          | 8-9                |
| Statistical methods    | <a href="#">#12b</a> | Describe any methods used to examine subgroups and interactions                                                                                                                                                                                                            | 8-9                |
| Statistical methods    | <a href="#">#12c</a> | Explain how missing data were addressed                                                                                                                                                                                                                                    | 8-9                |
| Statistical methods    | <a href="#">#12d</a> | If applicable, explain how loss to follow-up was addressed                                                                                                                                                                                                                 | N/A                |
| Statistical methods    | <a href="#">#12e</a> | Describe any sensitivity analyses                                                                                                                                                                                                                                          | 9                  |
| <b>Results</b>         |                      |                                                                                                                                                                                                                                                                            |                    |
| Participants           | <a href="#">#13a</a> | Report numbers of individuals at each stage of study—eg numbers potentially eligible, examined for eligibility, confirmed eligible, included in the study, completing follow-up, and analysed. Give information separately for exposed and unexposed groups if applicable. | 9-10               |
| Participants           | <a href="#">#13b</a> | Give reasons for non-participation at each stage                                                                                                                                                                                                                           | 9-10               |
| Participants           | <a href="#">#13c</a> | Consider use of a flow diagram                                                                                                                                                                                                                                             | 10                 |
| Descriptive data       | <a href="#">#14a</a> | Give characteristics of study participants (eg demographic, clinical, social) and information on exposures and potential confounders. Give information separately for exposed and unexposed groups if applicable.                                                          | Table 1/2          |
| Descriptive data       | <a href="#">#14b</a> | Indicate number of participants with missing data for each variable of interest                                                                                                                                                                                            | Table 1/2 (legend) |
| Descriptive data       | <a href="#">#14c</a> | Summarise follow-up time (eg, average and total amount)                                                                                                                                                                                                                    | Table 1/2          |
| Outcome data           | <a href="#">#15</a>  | Report numbers of outcome events or summary measures over time. Give information separately for exposed and unexposed groups if applicable.                                                                                                                                | Table 1/2          |
| Main results           | <a href="#">#16a</a> | Give unadjusted estimates and, if applicable, confounder-adjusted estimates and their precision (eg, 95% confidence interval). Make clear which confounders were adjusted for and why they were included                                                                   | Table 3/4/5        |
| Main results           | <a href="#">#16b</a> | Report category boundaries when continuous variables were categorized                                                                                                                                                                                                      | Table 3/4/5        |

|                          |                      |                                                                                                                                                                  |                      |
|--------------------------|----------------------|------------------------------------------------------------------------------------------------------------------------------------------------------------------|----------------------|
| Main results             | <a href="#">#16c</a> | If relevant, consider translating estimates of relative risk into absolute risk for a meaningful time period                                                     | N/A                  |
| Other analyses           | <a href="#">#17</a>  | Report other analyses done—eg analyses of subgroups and interactions, and sensitivity analyses                                                                   | Table S1/2/3/4 suppl |
| <b>Discussion</b>        |                      |                                                                                                                                                                  |                      |
| Key results              | <a href="#">#18</a>  | Summarise key results with reference to study objectives                                                                                                         | 18                   |
| Limitations              | <a href="#">#19</a>  | Discuss limitations of the study, taking into account sources of potential bias or imprecision. Discuss both direction and magnitude of any potential bias.      | 20-21                |
| Interpretation           | <a href="#">#20</a>  | Give a cautious overall interpretation considering objectives, limitations, multiplicity of analyses, results from similar studies, and other relevant evidence. | 20-21                |
| Generalisability         | <a href="#">#21</a>  | Discuss the generalisability (external validity) of the study results                                                                                            | 21                   |
| <b>Other Information</b> |                      |                                                                                                                                                                  |                      |
| Funding                  | <a href="#">#22</a>  | Give the source of funding and the role of the funders for the present study and, if applicable, for the original study on which the present article is based    | 21                   |

**Reference:**

von Elm E, Altman DG, Egger M, Pocock SJ, Gøtzsche PC, Vandenbroucke JP. The Strengthening of Reporting of Observational Studies in Epidemiology (STROBE) Statement: guidelines for reporting observational studies
